# Supplementary material
Source: PubMed Central journal article supplement (PMC4888345)

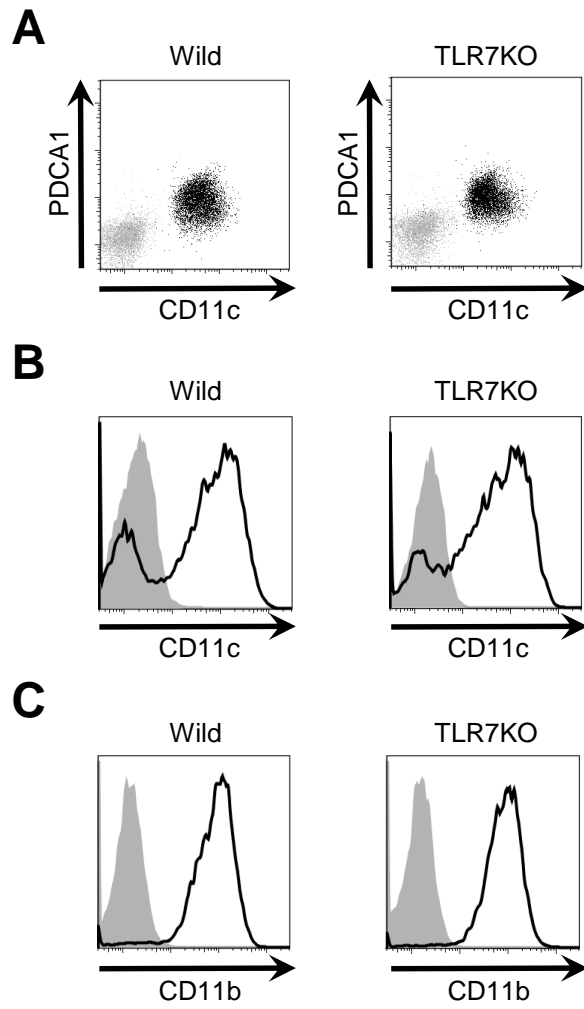

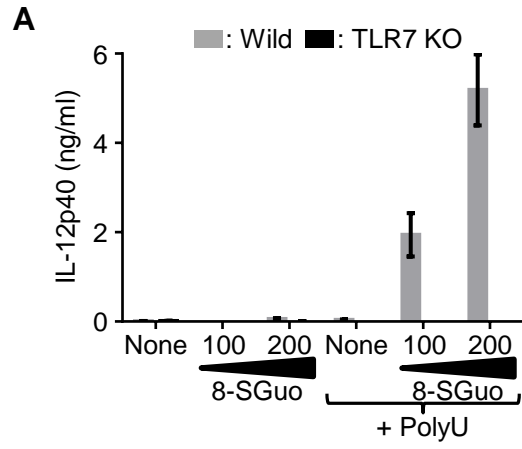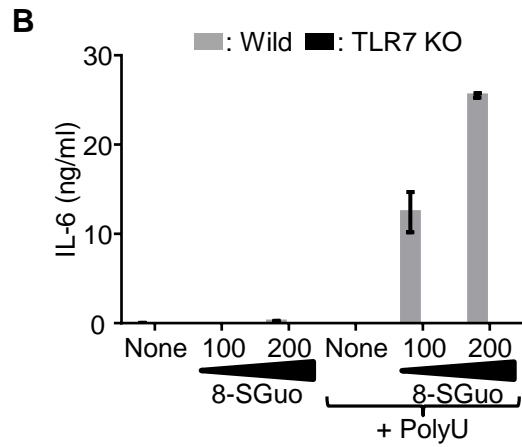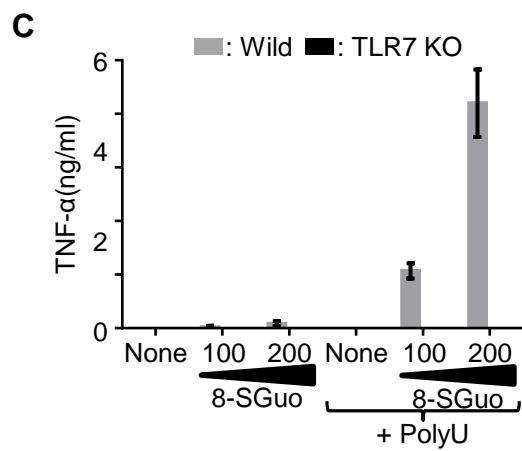

Supplement: supp_dxv062_Supplementary_Figures.pdf [file supp_dxv062_Supplementary_Figures.pdf]
